# Supplementary material for: Persistent telomere cohesion triggers a prolonged anaphase
Source: PubMed Central journal article supplement — Mol Biol Cell. 2014 Jan 1;25(1):30–40. doi: 10.1091/mbc.E13-08-0479 (PMC3873891; doi:10.1091/mbc.e13-08-0479), 2014-01-01
Supplement: supp_E13-08-0479v1_CombinedSupMats.pdf [file supp_E13-08-0479v1_CombinedSupMats.pdf]

# Supplemental Materials

*Molecular Biology of the Cell*

Kim and Smith

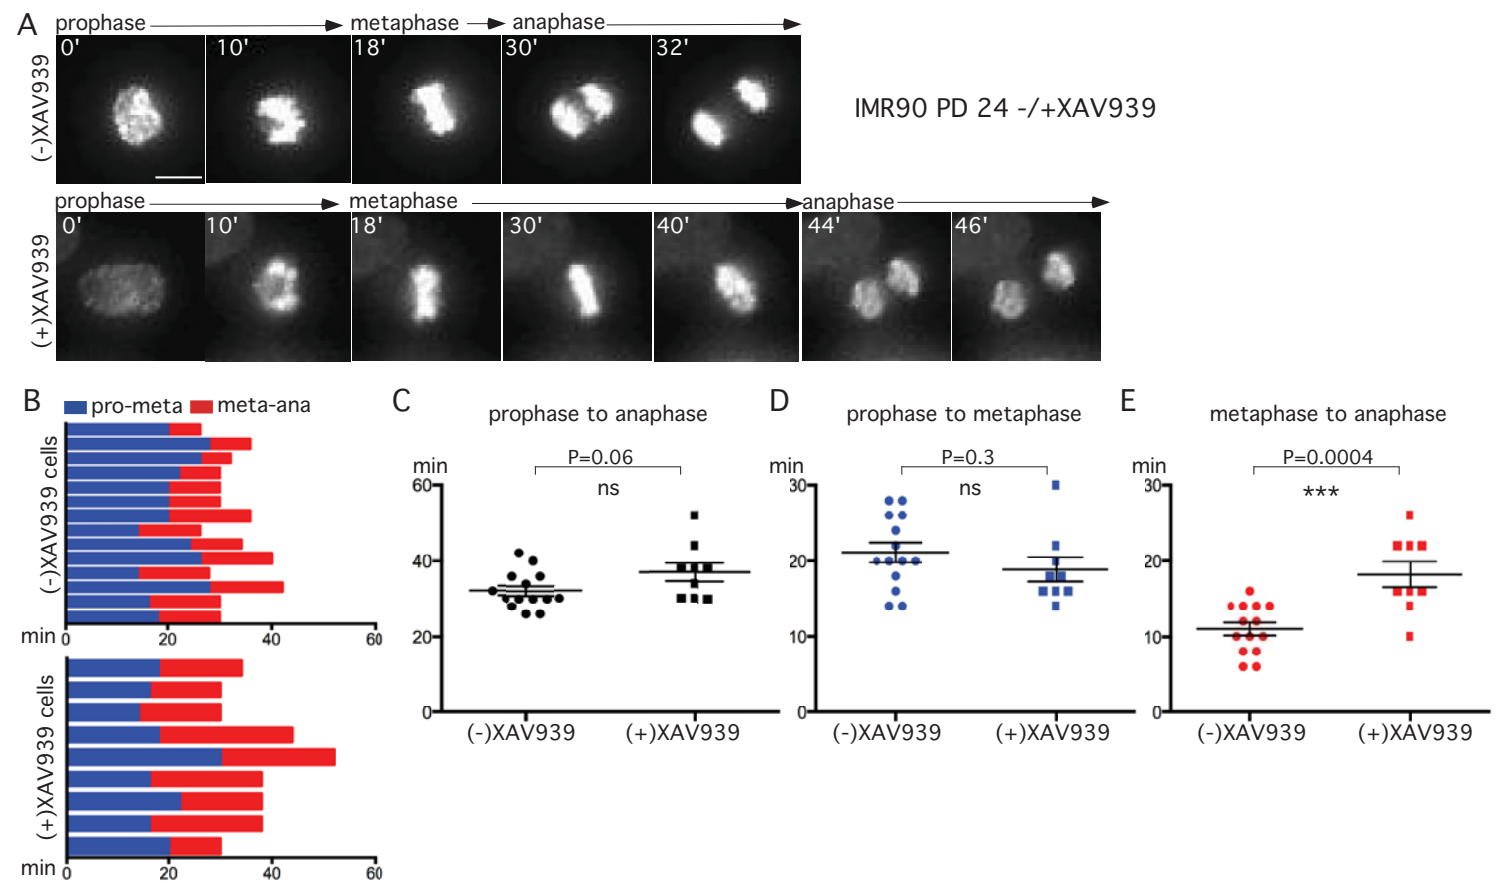

Figure S1. (A-E) Live cell imaging indicates that XAV939 induces anaphase delay in young IMR90 cells. IMR90-H2B-GFP (PD24 PD) cell lines were synchronized by a double thymidine block, released in the presence or absence of XAV939 for 7 hr, and imaged for 6 hrs. (A) Progression from prophase to anaphase for individual cells is shown. Scale bar, 5  $\mu$ m. Graphical summaries of individual mitotic cells (n= 9-14 cells each) shown as (B) a time line and (C-E) scatter plots with calculated mean value  $\pm$ sem. Student's t-test was used to calculate p-values (ns  $P \geq 0.05$ ; \*\*\*  $P \leq 0.001$ ).
